# Supplementary material for: Quantitative LIBS analysis of microalloyed steel using LASSO–LightGBM modeling with SHAP-based interpretability
Source: Royal Society of Chemistry journal article supplement (doi:10.1039/d5ja00314h), 2025-01-01
Supplement: d5ja00314h1.pdf [file d5ja00314h1.pdf]

1. The following optimization curves illustrate the relationships between delay time, defocus distance, laser energy, and integration time with intensity and signal-to-background ratio (SBR). So we selected the following parameters for our experiments: 1  $\mu$ s for the gate delay time, -4 mm for the defocus distance, 40 mJ for the laser energy, and 20  $\mu$ s for the integration time.

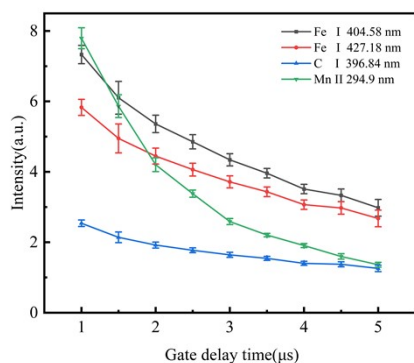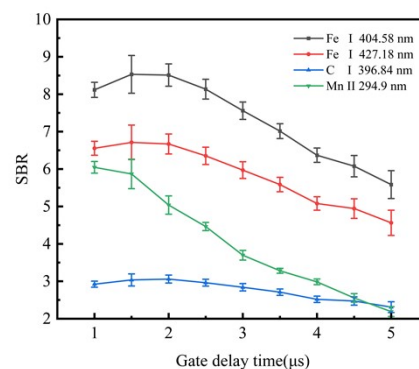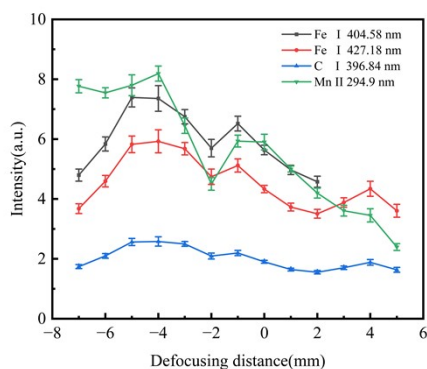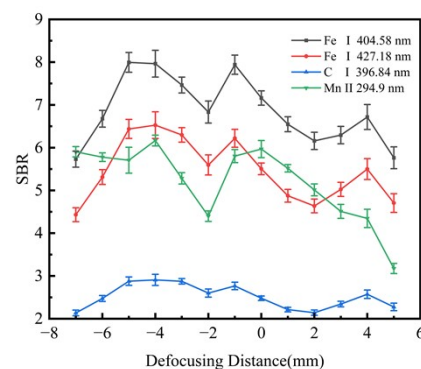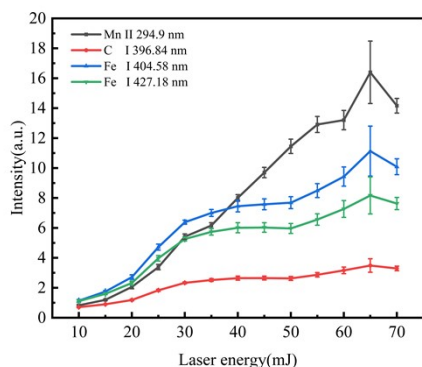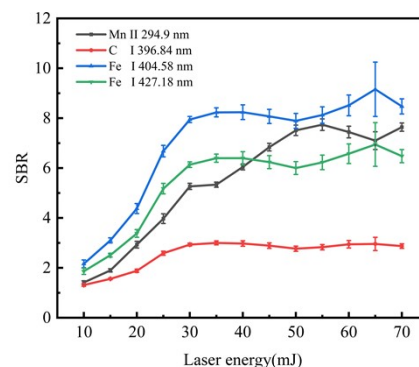

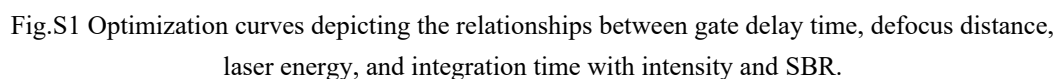[illegible]
